## RESERCH LETTER

### **The lasting effects of the pandemic: A time series analysis of first-time speech delays in kids under 5 years of age**

Brianna M. Goodwin Cartwright, MS<sup>1</sup>

Peter D Smits, PhD<sup>1</sup>

Sarah Stewart, MD<sup>1</sup>

Patricia J Rodriguez, PhD, MPH<sup>1</sup>

Samuel Gratzl, PhD<sup>1</sup>

Charlotte Baker, DrPH, MPH, CPH<sup>1</sup>

Nick Stucky, MD, PhD<sup>1</sup>

<sup>1</sup>Truveta, Inc. Bellevue, Washington.

**Corresponding Author:** Nick Stucky, M.D., Ph.D., VP Research, Truveta Inc. Email: [nicholass@truveta.com](mailto:nicholass@truveta.com)

Word Count: 600

## **Abstract:**

Given the profound effects of the COVID-19 pandemic on the way individuals interact, we sought to understand if there was an increase in pediatric first-time speech and language delay diagnoses. We identified children under five years of age with a first-time speech delay diagnosis between January 1, 2018 and February 28, 2023, in Truveta Data. We calculated the monthly rate of first-time speech delay diagnoses per children with an encounter within the last year and no previous speech delay diagnosis. The Seasonal-Trend decomposition using LOESS (STL) method was used to adjust for seasonality. We also compared the difference in means between the 2018/2019 and 2021/2022 time periods. Significant increases in the mean of rates between 2018/2019 and 2021/2022 exist for the overall population and each age strata ( $p < 0.001$ ). Likely the causes of these trends are multifaceted and future research is needed to understand the specific drivers at play.

According to the CDC, nearly 8% of children have a communication or speech and language disorder<sup>1</sup>. Although, timely intervention is linked to improved long-term outcomes, roughly half of children do not receive such services<sup>1,2</sup>.

Given the profound effect of the COVID-19 pandemic on the way many live and communicate, as well as the shift from in-person to telehealth speech and language pathology services<sup>3</sup>, we are interested to see if there is a change in first-time speech and language delay diagnoses. To the best of our knowledge, no published data exists on first-time diagnoses of speech delays before and after the pandemic.

**Methods:** We identified children under five years of age with first-time speech delay diagnosis defined using diagnostic codes (**Appendix**) between January 1, 2018 and February 28, 2023, in Truveta Data. Truveta Data consists of electronic health records provided by member U.S. healthcare systems that were deidentified by expert determination in accordance with the HIPAA Privacy Rule<sup>4,5</sup>. Included patients were primarily located in 12 states.

We calculated the monthly rate of first-time speech delay diagnoses per children with an encounter within the last year and no previous speech delay diagnosis. Patients were excluded if they did not have an associated encounter in the same month as their first-time diagnosis. We looked at the under-five population overall and stratified by age (0-1, 1-2, 2-3, 3-4, and 4-5 years of age).

The Seasonal-Trend decomposition using LOESS (STL) method was used to adjust for seasonality (data here are comprised of the trend and residual components of the time series). We also compared the difference in means between the 2018/2019 and 2021/2022 time periods. 2020 was not included due to variation in care throughout the year.

**Results:** We identified 2,463,511 patients less than 5-years old who had an encounter between January 2018 and February 2023 and no previous speech delay diagnosis; of these, 3.6% had a first-time diagnosis within this period (**Table 1**). Throughout the study period the two-year-old patients had the highest rate of first-time diagnoses, followed by the one-year-old patients (**Figure 1**).

Significant increases in the mean of rates between 2018/2019 and 2021/2022 exist for the overall population and each age strata ( $p < 0.001$ ). Overall, we see a significant increase of 1.55 times the rate of first-time speech diagnosis between 2018/2019 and 2021/2022 (2018/2019 rate: 1.58 [95% confidence interval: 1.53, 1.63], 2021/2022 rate: 2.45 [2.40, 2.51],  $p < 0.001$ ). We saw the largest increase in the patients who were one-year-old, where the rate increased by 1.69 times (2018/2019 rate: 2.71 [2.62, 2.80], 2021/2022 rate: 4.58 [4.47, 4.69],  $p < 0.001$ ). The patients who were two-year-old also increased by 1.63 times (2018/2019 rate: 3.31 [3.19, 3.43], 2021/2022 rate: 5.39 [5.23, 5.56],  $p < 0.001$ ).

## **Discussion:**

We found a significant increase in the rate of first-time speech delay diagnosis for all age groups studied, but most pronounced for the one- and two-year-old age groups. Interesting the one- and two-year-olds have the highest pre-pandemic rates. Likely the causes of these trends are

multifaceted and future research is needed to understand the specific drivers at play. Factors may include fewer social interactions and psychological distress, a reduction in speech propagation while wearing masks <sup>6</sup>, decreased effectiveness in therapy practices due to the shift to telemedicine <sup>3</sup>, or delays in care due to the pandemic <sup>7</sup>.

This study did not analyze severity of speech delay or initiation of therapy. Only diagnoses made by health systems were available; school or private practice-based diagnoses were not included. Age during months without an encounter was estimated using the age at previous encounters. Despite these limitations, these data show an increase in speech delay diagnoses in the years following the pandemic.

**TABLE 1** – Demographics of population with and without speech delays.

|                                                  | <b>Overall</b>   | <b>Without speech delays</b> | <b>With Speech delays</b> |
|--------------------------------------------------|------------------|------------------------------|---------------------------|
| <b>n</b>                                         | 2,463,511        | 2,375,730                    | 87,781                    |
| <b>Sex, n (%)</b>                                |                  |                              |                           |
| <b>Female</b>                                    | 1,173,756 (47.6) | 1,144,910 (48.2)             | 28,846 (32.9)             |
| <b>Male</b>                                      | 1,280,604 (52.0) | 1,221,861 (51.4)             | 58,743 (66.9)             |
| <b>Unknown</b>                                   | 9,151 (0.4)      | 8,959 (0.4)                  | 192 (0.2)                 |
| <b>Race, n (%)</b>                               |                  |                              |                           |
| <b>White</b>                                     | 1,221,564 (49.6) | 1,176,692 (49.5)             | 44,872 (51.1)             |
| <b>Black*</b>                                    | 247,261 (10.0)   | 236,123 (9.9)                | 11,138 (12.7)             |
| <b>Asian</b>                                     | 125,873 (5.1)    | 120,575 (5.1)                | 5,298 (6.0)               |
| <b>American Indian or Alaska Native</b>          | 18,518 (0.8)     | 17,604 (0.7)                 | 914 (1.0)                 |
| <b>Native Hawaiian or Other Pacific Islander</b> | 14,735 (0.6)     | 14,068 (0.6)                 | 667 (0.8)                 |
| <b>Other Race</b>                                | 293,004 (11.9)   | 281,707 (11.9)               | 11,297 (12.9)             |
| <b>Unknown</b>                                   | 542,556 (22.0)   | 528,961 (22.3)               | 13,595 (15.5)             |
| <b>Ethnicity, n (%)</b>                          |                  |                              |                           |
| <b>Hispanic or Latino</b>                        | 434,272 (17.6)   | 417,474 (17.6)               | 16,798 (19.1)             |
| <b>Not Hispanic or Latino</b>                    | 1,481,879 (60.2) | 1,422,498 (59.9)             | 59,381 (67.6)             |
| <b>Unknown</b>                                   | 547,360 (22.2)   | 535,758 (22.6)               | 11,602 (13.2)             |
| <b>AgeGroup, n (%)</b>                           |                  |                              |                           |
| <b>[0 - 1) years old</b>                         | 1,340 (1.5)      |                              | 1,340 (1.5)               |
| <b>[1 - 2) years old</b>                         | 30,013 (34.2)    |                              | 30,013 (34.2)             |
| <b>[2 - 3) years old</b>                         | 29,577 (33.7)    |                              | 29,577 (33.7)             |
| <b>[3 - 4) years old</b>                         | 15,728 (17.9)    |                              | 15,728 (17.9)             |
| <b>[4 - 5) years old</b>                         | 11,123 (12.7)    |                              | 11,123 (12.7)             |

\*Black refers to Black or African American Individuals

**FIGURE 1** - The seasonally adjusted first-time diagnosis rate of speech delays for each age group. The top panel shows overall and all age groups. The 4-lower graphs show each age group with rates above 1. The green line represents the trend, the dashed black line represents the 2-year mean, and the shaded grey regions are the 95% confidence intervals.

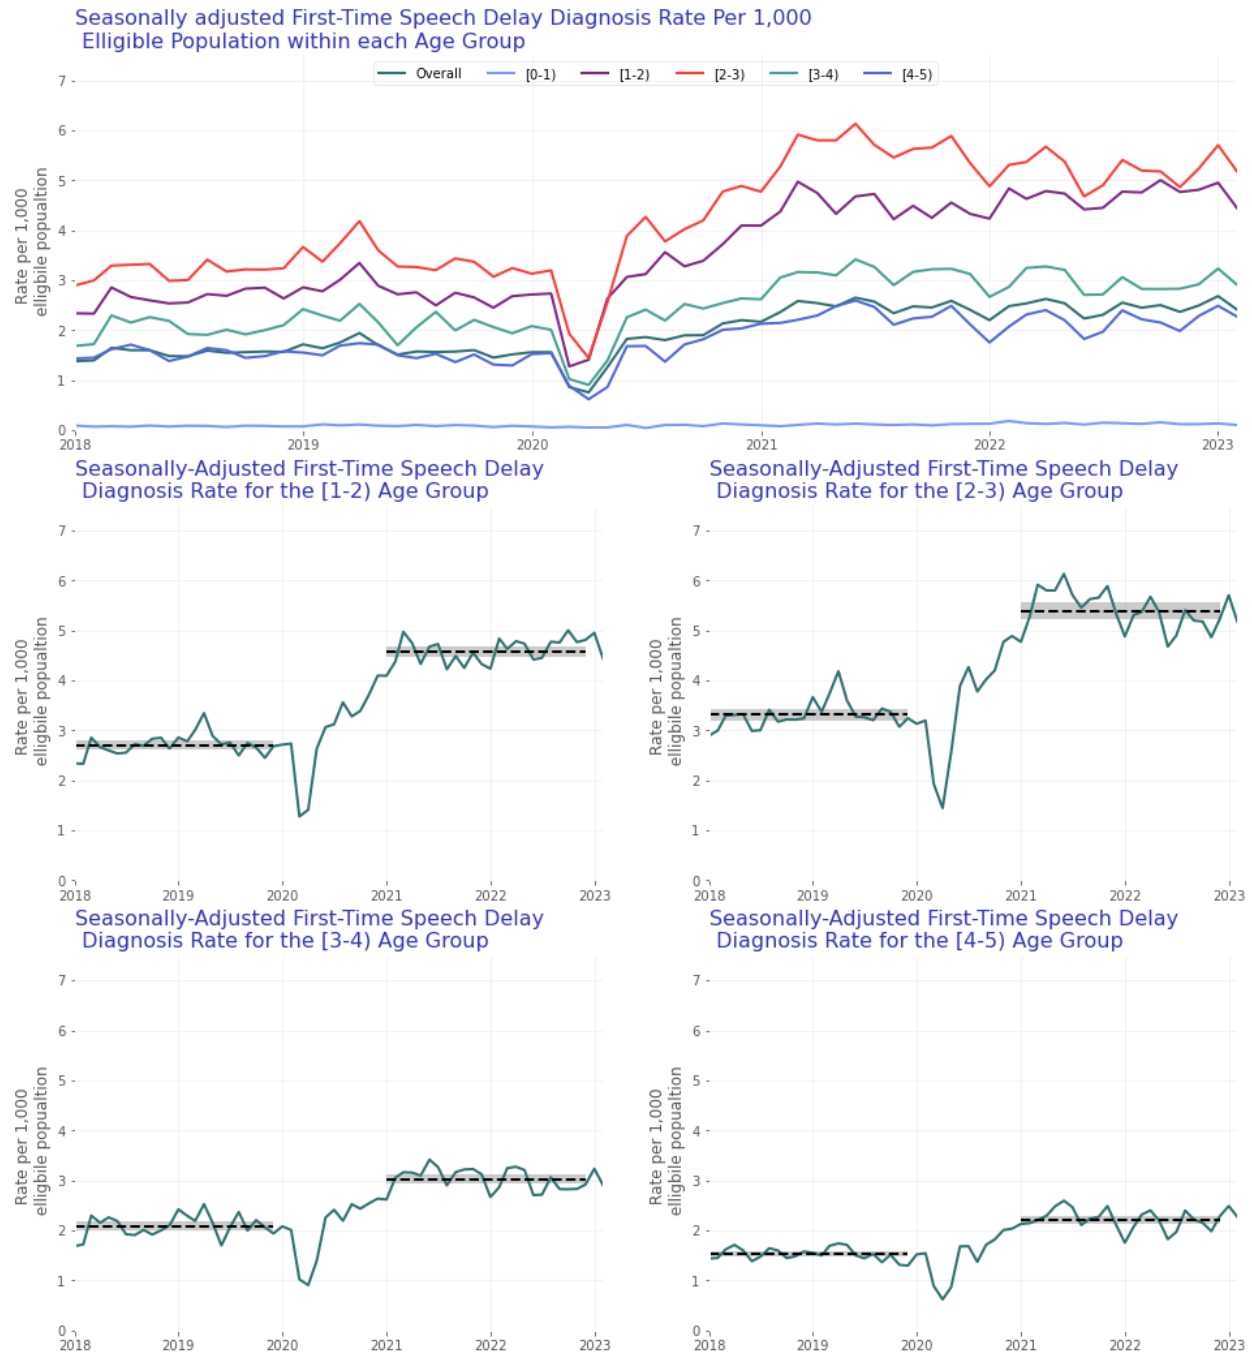

**Appendix** – Diagnostic codes used to define speech delays.

| <b>CODE SYSTEM</b> | <b>CONCEPT CODE</b> | <b>CONCEPT NAME</b>                         |
|--------------------|---------------------|---------------------------------------------|
| ICD-10-CM          | F80*                | Phonological disorder                       |
| SNOMED-CT          | 268672004           | Disorder of speech and language development |
| SNOMED-CT          | 229721007           | Speech delay                                |

## Citations:

1. Black LI, Vahratian A, Hoffman HJ. Communication disorders and use of intervention services among children aged 3–17 years: United States, 2012. *NCHS data brief*. 2015;205. <https://www.cdc.gov/nchs/products/databriefs/db205.htm>
2. Law J, Garrett Z, Nye C. Speech and language therapy interventions for children with primary speech and language delay or disorder. Cochrane Developmental, Psychosocial and Learning Problems Group, ed. *Cochrane Database of Systematic Reviews*. 2003;2015(5). doi:10.1002/14651858.CD004110
3. Tohidast SA, Mansuri B, Bagheri R, Azimi H. Provision of speech-language pathology services for the treatment of speech and language disorders in children during the COVID-19 pandemic: Problems, concerns, and solutions. *International Journal of Pediatric Otorhinolaryngology*. 2020;138:110262. doi:10.1016/j.ijporl.2020.110262
4. Althouse BM, Baker C, Smits PD, et al. Racial inequality in COVID-treatment and in-hospital length of stay in the US over time. *Front Public Health*. 2023;10:1074775. doi:10.3389/fpubh.2022.1074775
5. Smits PD, Gratzl S, Simonov M, et al. Risk of COVID-19 breakthrough infection and hospitalization in individuals with comorbidities. *Vaccine*. 2023;41(15):2447-2455. doi:10.1016/j.vaccine.2023.02.038
6. Caniato M, Marzi A, Gasparella A. How much COVID-19 face protections influence speech intelligibility in classrooms? *Applied Acoustics*. 2021;178:108051. doi:10.1016/j.apacoust.2021.108051
7. Macy ML, Smith TL, Cartland J, Golbeck E, Davis MM. Parent-reported hesitancy to seek emergency care for children at the crest of the first wave of COVID-19 in Chicago. *Acad Emerg Med*. 2021;28(3):355-358. doi:10.1111/acem.14214



**Institutional review board statement:**

This study performs analysis of de-identified electronic health records (EHR) data accessed via Truveta Studio. Truveta Studio only contains data that has been de-identified by expert determination in accordance with HIPAA Privacy Rule, and therefore this study was exempt from Institutional Review Board approval.

**Data availability statement:**

The data used in this study is available to all Truveta subscribers and may be accessed at [studio.truveta.com](https://studio.truveta.com).
